# Supplementary material for: Trends in High-Acuity Cardiovascular Events During the COVID-19 Pandemic
Source: PubMed Central journal article supplement (PMC10770765; doi:10.1001/jamahealthforum.2023.4572), 2024-01-05
Supplement: jamahealthforum-e234572-s002.pdf [file jamahealthforum-e234572-s002.pdf]

## Data Sharing Statement

Wharam. Trends in High-Acuity Cardiovascular Events During the COVID-19 Pandemic. *JAMA Health Forum*. Published January 05, 2024. doi:10.1001/jamahealthforum.2023.4572

### Data

**Data available:** No

### Additional Information

**Explanation for why data not available:** Not allowed by data partner
